# Supplementary material
Source: PubMed Central journal article supplement (PMC5068552)
Supplement: NIHMS70115-supplement-Supplementary_Tables.pdf [file NIHMS70115-supplement-Supplementary_Tables.pdf]

**Table S1. Item Content of Attention-Deficit/Hyperactivity Disorder (ADHD) Symptom Scales Included in the Genome-Wide Association (GWA) Meta-Analysis**

|                                                                                                                                                                  |                                                                                                                                                                                                                                                                                                                                                                                                                                                                                                                                                                                                                                                                                                                                                                                                                                                                                                                                                                                                                                                                                                                                                                    |
|------------------------------------------------------------------------------------------------------------------------------------------------------------------|--------------------------------------------------------------------------------------------------------------------------------------------------------------------------------------------------------------------------------------------------------------------------------------------------------------------------------------------------------------------------------------------------------------------------------------------------------------------------------------------------------------------------------------------------------------------------------------------------------------------------------------------------------------------------------------------------------------------------------------------------------------------------------------------------------------------------------------------------------------------------------------------------------------------------------------------------------------------------------------------------------------------------------------------------------------------------------------------------------------------------------------------------------------------|
| CBCL 1.5-5: Attention Problems scale                                                                                                                             | <ul style="list-style-type: none"> <li>• Can't concentrate, can't pay attention for long</li> <li>• Can't sit still, restless, or hyperactive</li> <li>• Poorly coordinated or clumsy</li> <li>• Quickly shifts from one activity to another</li> <li>• Wanders away</li> </ul>                                                                                                                                                                                                                                                                                                                                                                                                                                                                                                                                                                                                                                                                                                                                                                                                                                                                                    |
| CBCL 6-18: Attention Problems scale                                                                                                                              | <ul style="list-style-type: none"> <li>• Acts too young for his/her age</li> <li>• Fails to finish things he/she starts</li> <li>• Can't concentrate, can't pay attention for long</li> <li>• Can't sit still, restless, or hyperactive; Confused or seems to be in a fog</li> <li>• Daydreams or gets lost in his/her thoughts</li> <li>• Impulsive or acts without thinking</li> <li>• Poor school work</li> <li>• Inattentive or easily distracted</li> <li>• Stares blankly</li> </ul>                                                                                                                                                                                                                                                                                                                                                                                                                                                                                                                                                                                                                                                                         |
| SDQ: Hyperactivity-inattention scale                                                                                                                             | <ul style="list-style-type: none"> <li>• Restless, overactive, cannot stay still for long</li> <li>• Constantly fidgeting or squirming</li> <li>• Easily distracted, concentration wanders</li> <li>• Thinks things out before acting</li> <li>• Sees tasks through to the end, good attention span</li> </ul>                                                                                                                                                                                                                                                                                                                                                                                                                                                                                                                                                                                                                                                                                                                                                                                                                                                     |
| <p>Conners' Rating Scales-Revised: Long Form</p> <p>Other <i>DSM-IV</i>-based rating scales</p> <p>(items may be phrased slightly differently across scales)</p> | <ul style="list-style-type: none"> <li>• Often fails to give close attention to details or makes careless mistakes in schoolwork, work, or other activities</li> <li>• Often has difficulty sustaining attention in tasks or play activities</li> <li>• Often does not seem to listen when spoken to directly</li> <li>• Often does not follow through on instructions and fails to finish schoolwork, chores, or duties in the workplace (not due to oppositional behaviour or failure of comprehension)</li> <li>• Often has difficulty organizing tasks and activities</li> <li>• Often avoids, dislikes, or is reluctant to engage in tasks that require sustained mental effort (such as schoolwork or homework)</li> <li>• Often loses things necessary for tasks or activities at school or at home (e.g. toys, school assignments, pencils, books or tools)</li> <li>• Is often easily distracted by extraneous stimuli</li> <li>• Is often forgetful in daily activities</li> <li>• Often fidgets with hands or feet or squirms in seat</li> <li>• Often leaves seat in classroom or in other situations in which remaining seated is expected</li> </ul> |

- |  |                                                                                                                                                                                                                                                                                                                                                                                                                                                                                                                                                     |
|--|-----------------------------------------------------------------------------------------------------------------------------------------------------------------------------------------------------------------------------------------------------------------------------------------------------------------------------------------------------------------------------------------------------------------------------------------------------------------------------------------------------------------------------------------------------|
|  | <ul style="list-style-type: none"><li>• Often runs about or climbs excessively in situations in which it is inappropriate</li><li>• Often has difficulty playing or engaging in leisure activities quietly</li><li>• Is often “on the go” or often acts as if “driven by a motor”</li><li>• Often talks excessively</li><li>• Often has difficulty awaiting turn</li><li>• Often blurts out answers to questions before they have been completed</li><li>• Often interrupts or intrudes on others, e.g. butts into other children's games</li></ul> |
|--|-----------------------------------------------------------------------------------------------------------------------------------------------------------------------------------------------------------------------------------------------------------------------------------------------------------------------------------------------------------------------------------------------------------------------------------------------------------------------------------------------------------------------------------------------------|

Note: CBCL = Child Behavior Checklist; SDQ = Strengths and Difficulties Questionnaire.

**Table S2. Description of Methods Used for Imputation and Analysis in Each Cohort Included in the Genome-Wide Association (GWA) Meta-Analysis.**

| Cohort       | Genotyping Platform                   | Pre-Imputation Variant Filters |       |      |                                                                                          | Pre-Imputation Sample Filters |                       |           |                   |                                                           | Imputation Software                       | Post-Imputation Filters           | Association Software |
|--------------|---------------------------------------|--------------------------------|-------|------|------------------------------------------------------------------------------------------|-------------------------------|-----------------------|-----------|-------------------|-----------------------------------------------------------|-------------------------------------------|-----------------------------------|----------------------|
|              |                                       | call rate                      | MAF   | HWE  | other filters                                                                            | call rate                     | Heterozygosity        | ethnicity | gender mismatches | other filters                                             |                                           |                                   |                      |
| ALSPAC       | Illumina HumanHap550 quad-chip        | 0.95                           | 0.01  | 5E-7 |                                                                                          | 0.97                          | yes                   | yes       | yes               | >10% identity by descent, insufficient sample replication | Minimac and Mach                          | None                              | Mach2QTL V112        |
| Generation R | Illumina Human 610 and 660 Quad Array | 0.95                           | 0.001 | 1E-7 |                                                                                          | 0.975                         | yes                   | yes       | yes               | relatedness                                               | Minimac and Mach                          | None                              | Plink 1.07           |
| GINI / LISA  | Affymetrix 5.0 and Affymetrix 6.0     | 0.95                           | 0.01  | 1E-5 |                                                                                          | 0.95                          | > 4 SD                |           | yes               | similarity QC based on MDS                                | Impute v2.3.0                             | SNPTEST NA for BETA, SE and P_VAL | SNPTEST v2.4.1       |
| INMA         | Illumina Human Omni1                  | 0.95                           | 0.01  | 1E-6 |                                                                                          | 0.98                          |                       | no        | yes               | LRR SD>0.3, duplicates, relatedness                       | Impute v.2                                | None                              | SNPtest v.2          |
| MoBa         | Illumina Human 660W Quad Array        | 0.97                           | 0.01  | 1E-6 | Mitochondrial SNPs, chrY&PAR SNPs, SNPs that could not be updated to hg37, non-"rs" SNPs | 0.96                          | > 4 SD                | yes       | yes               | relatedness                                               | SHAPEIT (v2.r644), Impute (version 2.3.0) | SNPTEST NA for BETA and P_VAL     | SNPTEST v2.5-beta4   |
| NTR          | Affymetrix 6.0                        | 0.95                           | 0.01  | 1E-5 | Double-typed error rate > 0.02, Mendel error rate > 0.02, allele frequency               | 0.90                          | F > 0.10 or F < -0.10 | no        | yes               | IBS/IBD discrepancies, Mendel error rate > 0.02           | Minimac and Mach                          | Plink NA for BETA, SE and P_VAL   | Plink 1.07           |

|        |                                |      |      |        |                                                                        |      |                                   |     |     |                                                     |           |                          |               |
|--------|--------------------------------|------|------|--------|------------------------------------------------------------------------|------|-----------------------------------|-----|-----|-----------------------------------------------------|-----------|--------------------------|---------------|
|        |                                |      |      |        | difference with reference set > 0.20, C/G and A/T SNPs with MAF > 0.35 |      |                                   |     |     |                                                     |           |                          |               |
| Raine  | Illumina Human 660W Quad Array | 0.95 | 0.01 | 5.7E-7 | C/G and A/T SNPs removed                                               | 0.97 | F > 0.1875; heterozygosity > 0.30 | no  | yes |                                                     | Mach      |                          |               |
| TEDS   | Affymetrix 6.0                 | 0.80 | 0.01 | 1E-20  | SNPTEST info > 0.975                                                   | 0.98 | yes                               | yes | yes | relatedness (IBD < 5%), regentyping low concordance | Impute v2 | None                     | Plink 1.07    |
| TRAILS | Illumina Cyto SNP12 v2         | 0.95 | 0.01 | 1E-3   | chr X SNPs >1% heterozygous in men                                     | 0.95 | > 4 SD                            | yes | yes | duplicates                                          | Impute v2 | Callrate 10%, duplicates | SNPtest 2.4.1 |

Note: ALSPAC = Avon Longitudinal Study of Parents and Children; GINI = German Infant Nutritional Intervention; HWE = Hardy Weinberg equilibrium; IBD = identity by descent; IBS = identity by state; INMA = Infancia y Medio Ambiente; LISA = Influence of Life-style factors on Development of the Immune System and Allergies in East and West Germany plus Air Pollution and Genetics on Allergy Development; LRR = log r ratio; MAF = minor allele frequency; MDS = multidimensional scaling; MoBa = Norwegian Mother and Child Cohort Study; NTR = Netherlands Twin Register; QC = quality control; SNP = single nucleotide polymorphism; TEDS = Twins Early Development Study; TRAILS = 'Tracking Adolescents' Individual Lives' Survey.

**Table S3. Results of the Data Cleaning for the Nine Cohorts Included in the Meta-Analysis**

| Cohort       | N     | N Variants<br>Uploaded | N Variants<br>Cleaned | Lambda |
|--------------|-------|------------------------|-----------------------|--------|
| ALSPAC       | 5,757 | 31,326,386             | 5,942,106             | 1.01   |
| Generation R | 2,211 | 30,072,738             | 5,907,888             | 1.02   |
| GINI / LISA  | 1,389 | 16,275,553             | 5,554,016             | 1.02   |
| INMA         | 804   | 16,105,103             | 6,245,251             | 1.08   |
| MOBA         | 665   | 14,154,076             | 6,177,049             | 1.02   |
| NTR          | 1,605 | 8,868,990              | 5,654,673             | 1.03   |
| Raine        | 1,338 | 28,625,631             | 5,260,671             | 0.99   |
| TEDS         | 2,606 | 12,223,562             | 5,572,678             | 0.98   |
| TRAILS       | 1,285 | 18,183,428             | 5,763,633             | 1.02   |

Note: ALSPAC = Avon Longitudinal Study of Parents and Children; GINI = German Infant Nutritional Intervention; INMA = Infancia y Medio Ambiente; LISA = Influence of Life-style factors on Development of the Immune System and Allergies in East and West Germany plus Air Pollution and Genetics on Allergy Development; MoBa = Norwegian Mother and Child Cohort Study; NTR = Netherlands Twin Register; TEDS = Twins Early Development Study; TRAILS = 'TRacking Adolescents' Individual Lives' Survey.

**Table S4. Results of Gene-Based Tests for Previously Identified Attention-Deficit/Hyperactivity Disorder (ADHD)****Candidate Genes**

| Gene          | Chr | Start Position (GRCh37) | Stop Position (GRCh37) | N SNPs | p-value |
|---------------|-----|-------------------------|------------------------|--------|---------|
| <i>DRD4</i>   | 11  | 637305                  | 640706                 | 5      | .88     |
| <i>DRD5</i>   | 4   | 9783258                 | 9785633                | 2      | .84     |
| <i>GIT1</i>   | 17  | 27900487                | 27916610               | 16     | .60     |
| <i>HTR1B</i>  | 6   | 78171948                | 78173120               | 2      | .25     |
| <i>NOS1</i>   | 12  | 117645947               | 117799607              | 347    | .18     |
| <i>SLC6A3</i> | 5   | 1392905                 | 1445543                | 137    | .50     |
| <i>SLC6A4</i> | 17  | 28523376                | 28562954               | 48     | .91     |
| <i>SNAP25</i> | 20  | 10199477                | 10288065               | 173    | .88     |
| <i>SLC9A9</i> | 3   | 142984064               | 143567373              | 1457   | .11     |

Note: SNP = single nucleotide polymorphism.
