# Supplementary material
Source: PubMed Central journal article supplement (PMC5068552)

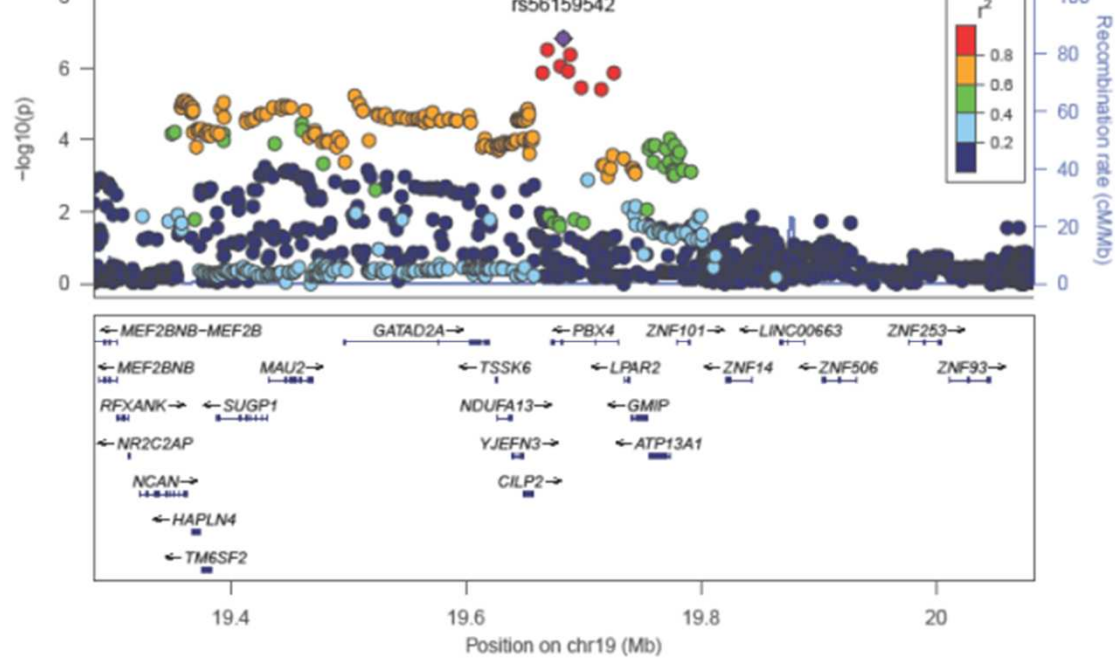

### rs4629772 on chr7

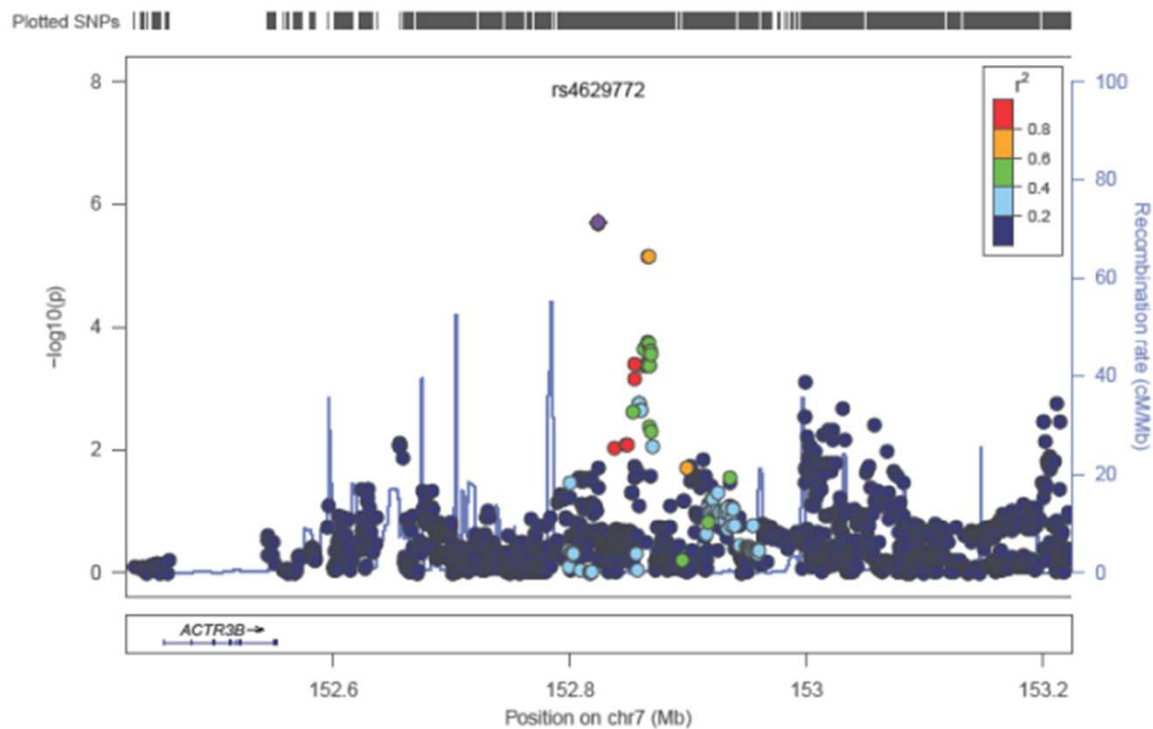

### rs79846815 on chr7

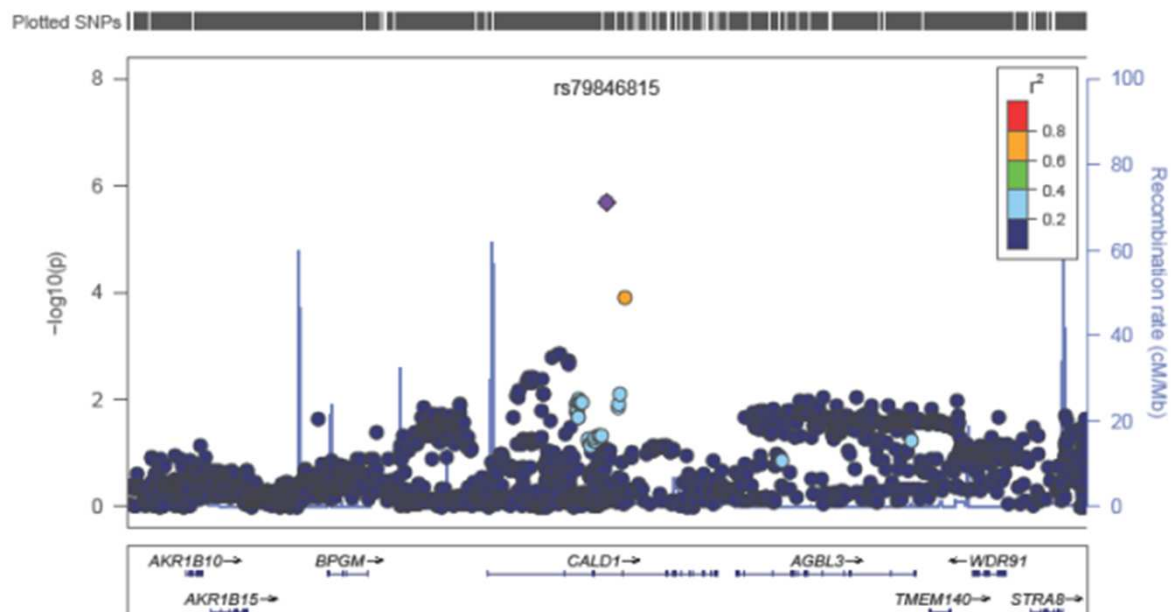

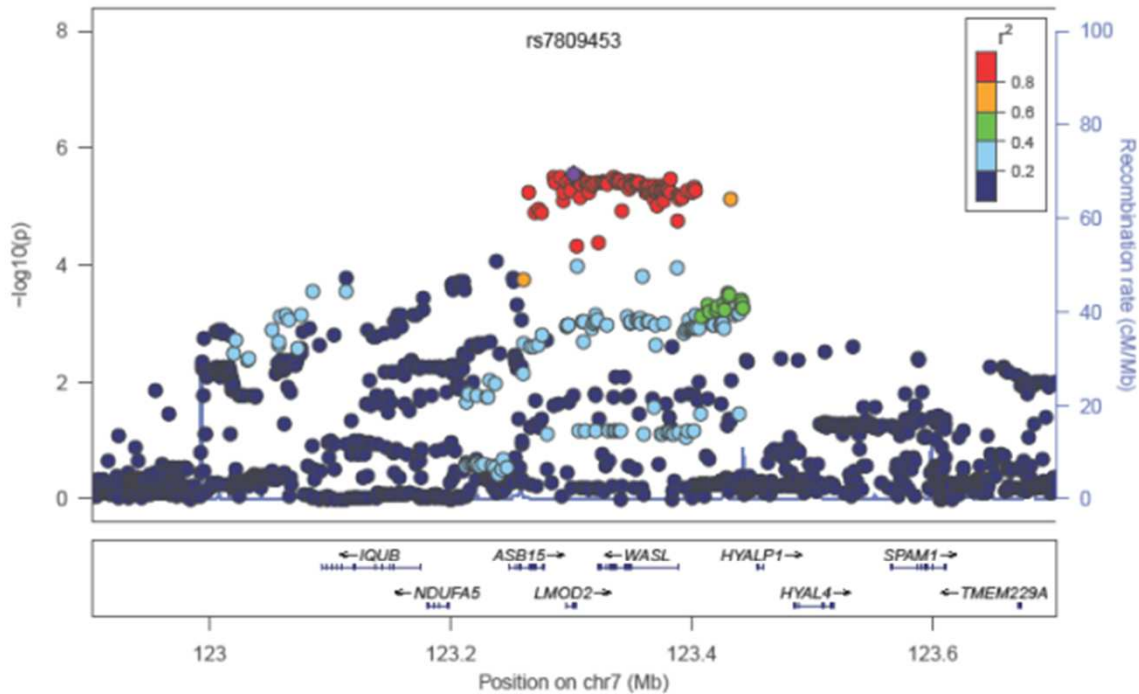

### rs79162905 on chr14

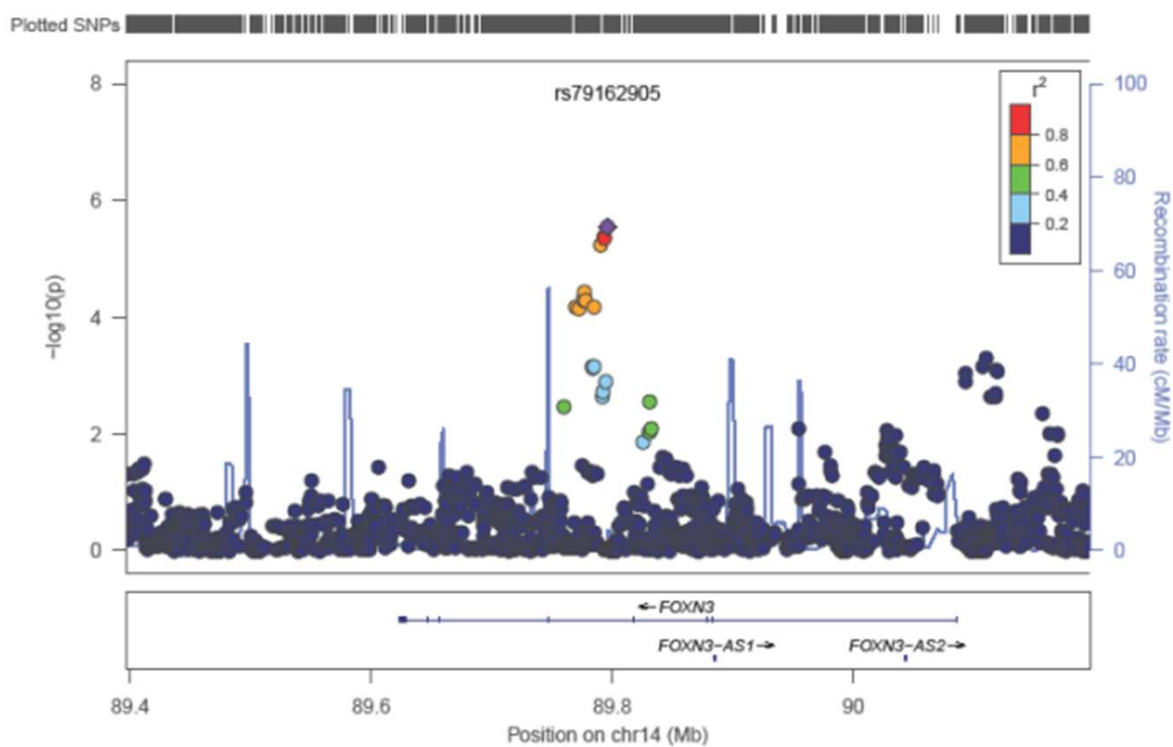

### rs146855089 on chr2

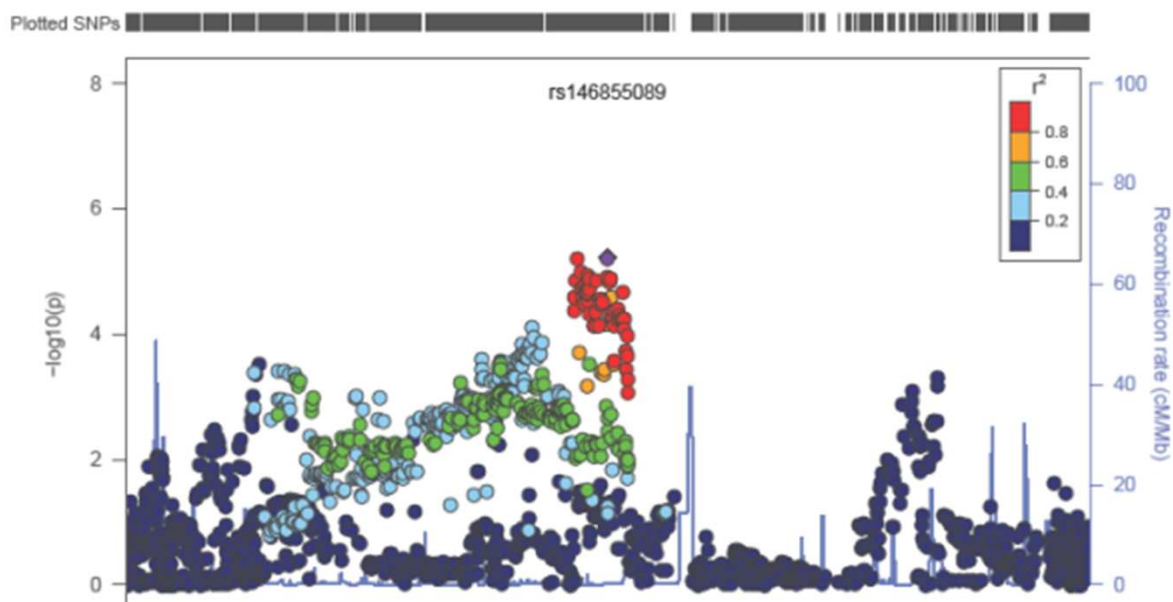

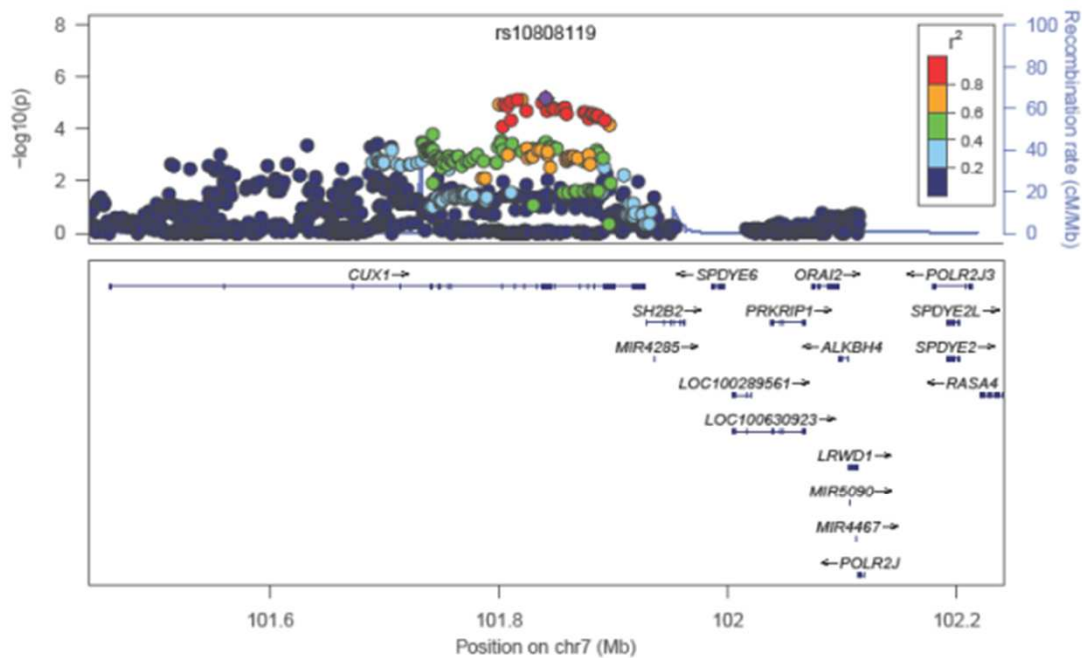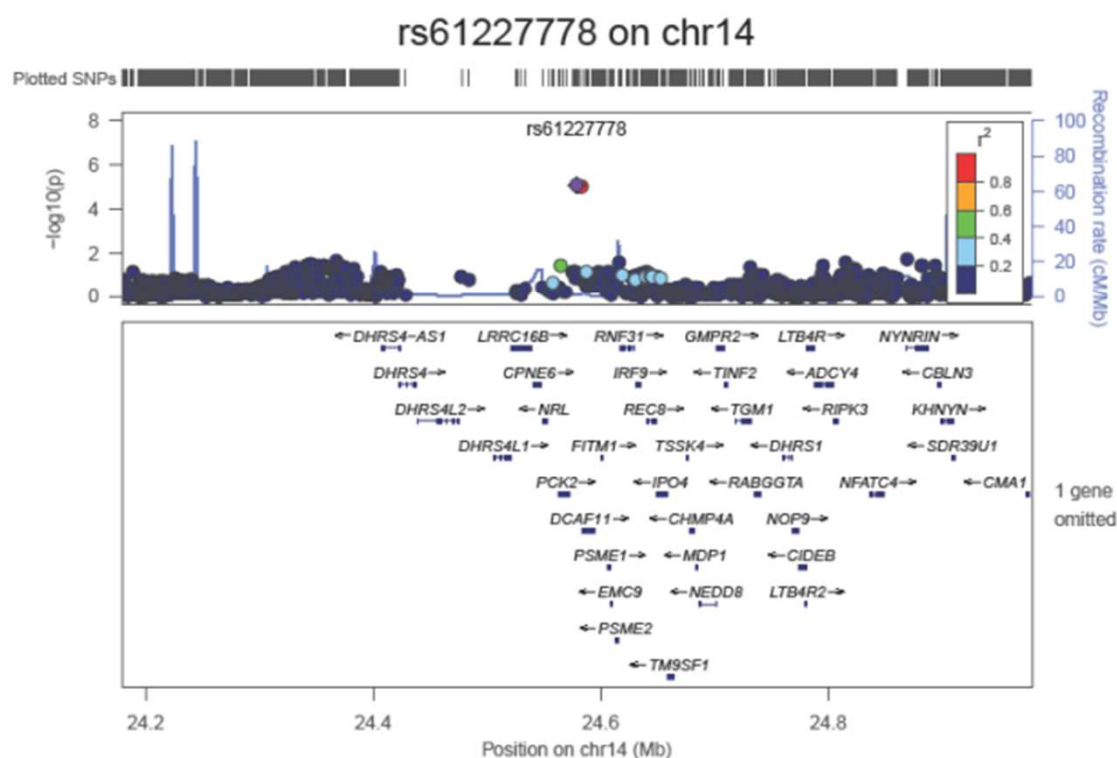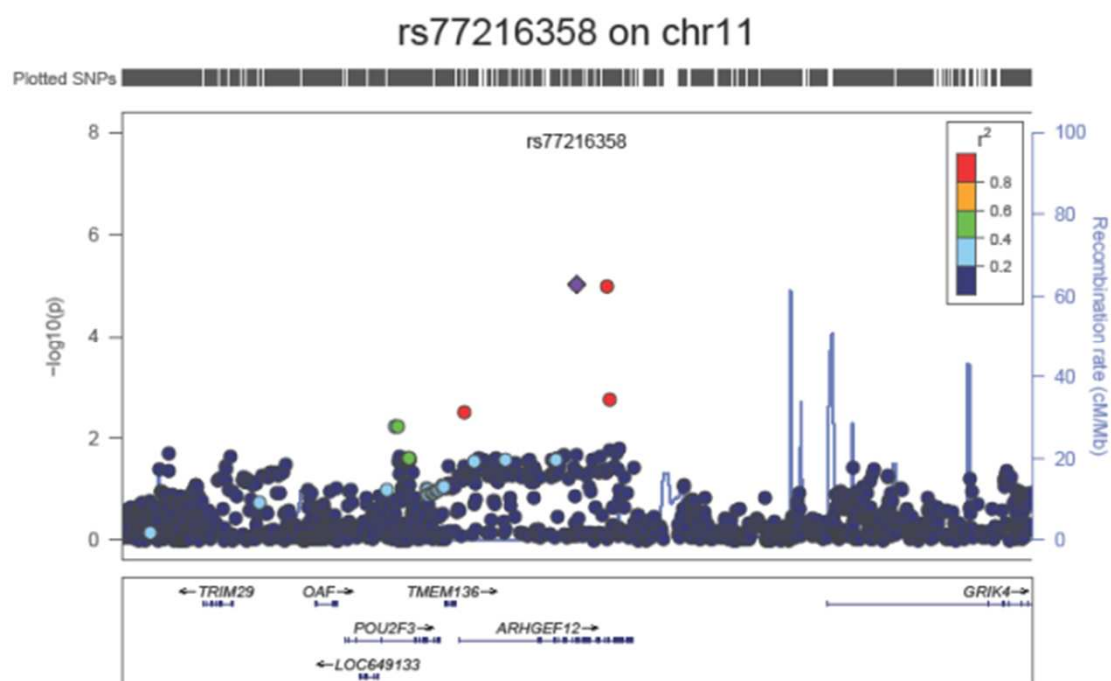

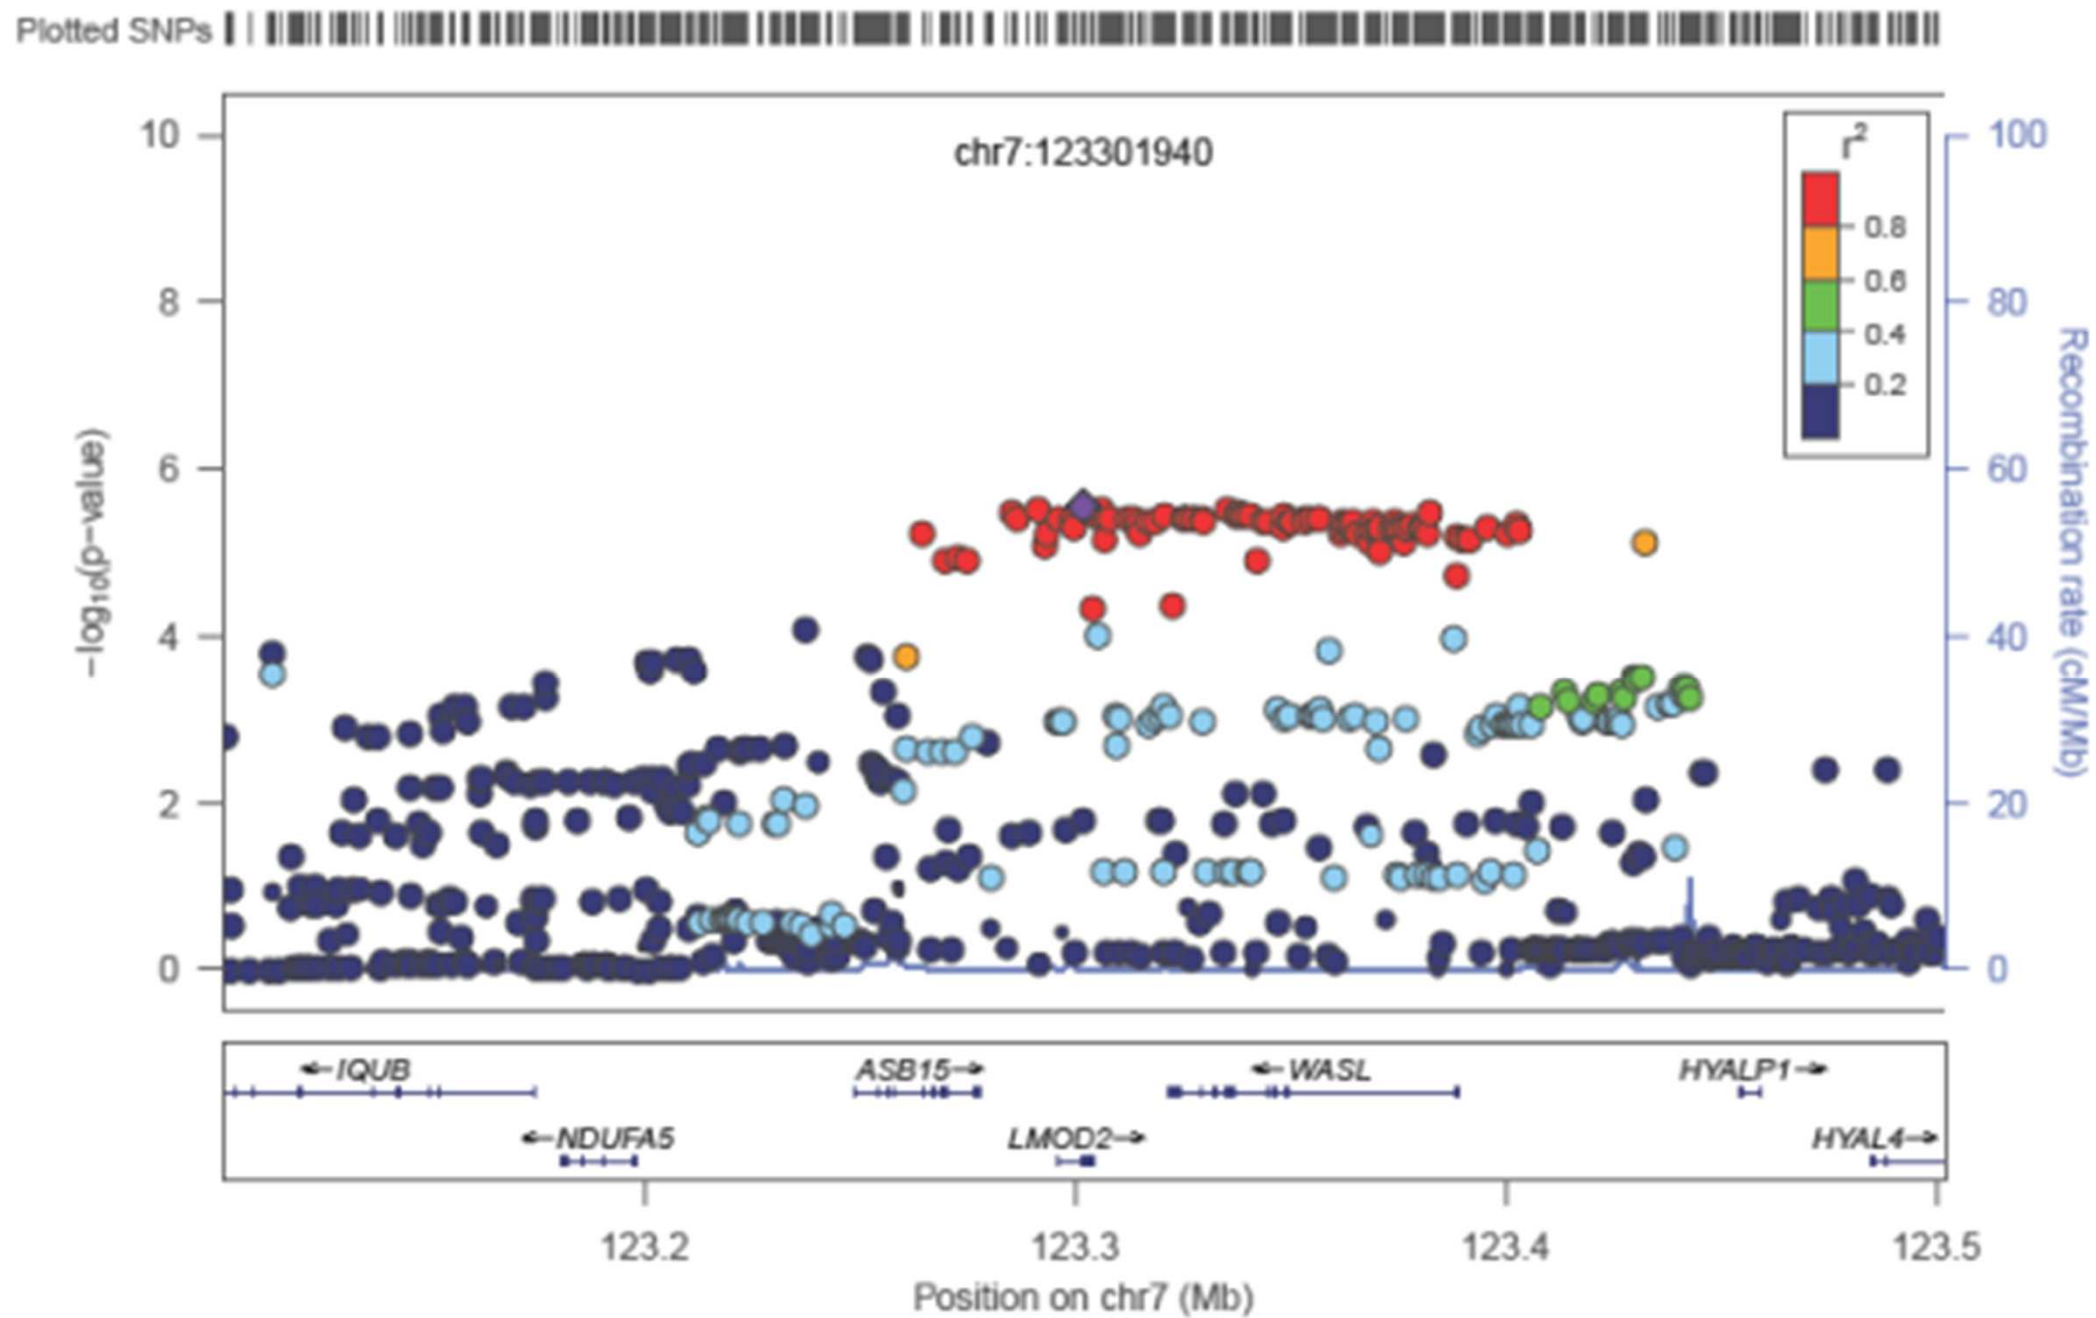

Supplement: NIHMS70115-supplement-Figures_S1_and_S2.pdf [file NIHMS70115-supplement-Figures_S1_and_S2.pdf]
